# Supplementary material
Source: publisher site journal article supplement (https://www.dovepress.com/article/611592)
Supplement: Supplementary file 1 [file 611592%20Supplementary%20Materials.docx]

**Supplementary materials**

**Supplementary Table S1. Pairwise comparisons of VAS scores within and between timepoints in the FSN and control groups.**

| Pairwise comparison of VAS scores within and between timepoints in FSN and Control groups | | | | | | | |
| --- | --- | --- | --- | --- | --- | --- | --- |
| Group | (I) VAS | (J) VAS | Mean Difference(I–J) | Std. Error | Significance | 95% Confidence Interval of Difference | |
| Lower Bound | Upper Bound |
| FSN group | Pre-op | Post-op 3 days | 1.292* | 0.179 | 0 | 0.81 | 1.774 |
|  | Post-rehab | 4.188* | 0.212 | 0 | 3.615 | 4.76 |
|  | Post-op 3 months | 4.563* | 0.208 | 0 | 4.002 | 5.123 |
| Post-op 3 days | Pre-op | -1.292* | 0.179 | 0 | -1.774 | -0.81 |
|  | Post-rehab | 2.896* | 0.181 | 0 | 2.408 | 3.384 |
|  | Post-op 3 months | 3.271* | 0.19 | 0 | 2.759 | 3.783 |
| Post-rehab | Pre-op | -4.187* | 0.212 | 0 | -4.76 | -3.615 |
|  | Post-op 3 days | -2.896* | 0.181 | 0 | -3.384 | -2.408 |
|  | Post-op 3 months | 0.375 | 0.178 | 0.228 | -0.105 | 0.855 |
| Post-op 3 months | Pre-op | -4.562* | 0.208 | 0 | -5.123 | -4.002 |
|  | Post-op 3 days | -3.271* | 0.19 | 0 | -3.783 | -2.759 |
|  | Post-rehab | -0.375 | 0.178 | 0.228 | -0.855 | 0.105 |
| Control group | Pre-op | Post-op 3 days | .688* | 0.179 | 0.001 | 0.206 | 1.169 |
|  | Post-rehab | 2.958* | 0.212 | 0 | 2.386 | 3.53 |
|  | Post-op 3 months | 3.813* | 0.208 | 0 | 3.252 | 4.373 |
| Post-op 3 days | Pre-op | -.687* | 0.179 | 0.001 | -1.169 | -0.206 |
|  | Post-rehab | 2.271* | 0.181 | 0 | 1.783 | 2.759 |
|  | Post-op 3 months | 3.125* | 0.19 | 0 | 2.613 | 3.637 |
| Post-rehab | Pre-op | -2.958* | 0.212 | 0 | -3.53 | -2.386 |
|  | Post-op 3 days | -2.271* | 0.181 | 0 | -2.759 | -1.783 |
|  | Post-op 3 months | .854* | 0.178 | 0 | 0.374 | 1.334 |
| Post-op 3 months | Pre-op | -3.812* | 0.208 | 0 | -4.373 | -3.252 |
|  | Post-op 3 days | -3.125* | 0.19 | 0 | -3.637 | -2.613 |
|  | Post-rehab | -.854* | 0.178 | 0 | -1.334 | -0.374 |
| Based on estimated marginal means. | | | | | | | |
| * Mean difference is significant at the 0.05 level. | | | | | | | |
| Adjustment for multiple comparisons: Bonferroni correction | | | | | | | |

**Supplementary Table S2. Pairwise comparisons of NDI scores within and between timepoints in the FSN and control groups.**

| Pairwise comparison of NDI scores within and between timepoints in FSN and Control groups | | | | | | | |
| --- | --- | --- | --- | --- | --- | --- | --- |
| Group | (I) NDI | (J) NDI | Mean Difference(I–J) | Std. Error | Significance | 95% Confidence Interval of Difference | |
| Lower Bound | Upper Bound |
| FSN group | Pre-op | Post-op 3 days | 9.187* | 0.511 | 0 | 7.809 | 10.566 |
|  | Post-rehab | 12.896* | 0.541 | 0 | 11.436 | 14.355 |
|  | Post-op 3 months | 16.146* | 0.563 | 0 | 14.627 | 17.664 |
| Post-op 3 days | Pre-op | -9.187* | 0.511 | 0 | -10.566 | -7.809 |
|  | Post-rehab | 3.708* | 0.303 | 0 | 2.891 | 4.525 |
|  | Post-op 3 months | 6.958* | 0.333 | 0 | 6.06 | 7.857 |
| Post-rehab | Pre-op | -12.896* | 0.541 | 0 | -14.355 | -11.436 |
|  | Post-op 3 days | -3.708* | 0.303 | 0 | -4.525 | -2.891 |
|  | Post-op 3 months | 3.250* | 0.272 | 0 | 2.517 | 3.983 |
| Post-op 3 months | Pre-op | -16.146* | 0.563 | 0 | -17.664 | -14.627 |
|  | Post-op 3 days | -6.958* | 0.333 | 0 | -7.857 | -6.06 |
|  | Post-rehab | -3.250* | 0.272 | 0 | -3.983 | -2.517 |
| Control group | Pre-op | Post-op 3 days | 8.771* | 0.511 | 0 | 7.393 | 10.149 |
|  | Post-rehab | 11.104* | 0.541 | 0 | 9.645 | 12.564 |
|  | Post-op 3 months | 14.208* | 0.563 | 0 | 12.69 | 15.727 |
| Post-op 3 days | Pre-op | -8.771* | 0.511 | 0 | -10.149 | -7.393 |
|  | Post-rehab | 2.333* | 0.303 | 0 | 1.516 | 3.15 |
|  | Post-op 3 months | 5.438* | 0.333 | 0 | 4.539 | 6.336 |
| Post-rehab | Pre-op | -11.104* | 0.541 | 0 | -12.564 | -9.645 |
|  | Post-op 3 days | -2.333* | 0.303 | 0 | -3.15 | -1.516 |
|  | Post-op 3 months | 3.104* | 0.272 | 0 | 2.371 | 3.837 |
| Post-op 3 months | Pre-op | -14.208* | 0.563 | 0 | -15.727 | -12.69 |
|  | Post-op 3 days | -5.437* | 0.333 | 0 | -6.336 | -4.539 |
|  | Post-rehab | -3.104* | 0.272 | 0 | -3.837 | -2.371 |
| Based on estimated marginal means. | | | | | | | |
| * Mean difference is significant at the 0.05 level. | | | | | | | |
| Adjustment for multiple comparisons: Bonferroni correction | | | | | | | |

**Supplementary Table S3. Pairwise comparisons of JOA scores within and between timepoints in the FSN and control groups.**

| Pairwise comparison of JOA scores within and between timepoints in FSN and Control groups | | | | | | | |
| --- | --- | --- | --- | --- | --- | --- | --- |
| Group | (I) JOA | (J) JOA | Mean Difference(I–J) | Std. Error | Significance | 95% Confidence Interval of Difference | |
| Lower Bound | Upper Bound |
| FSN group | Pre-op | Post-op 3 days | -3.292* | 0.216 | 0 | -3.873 | -2.71 |
|  | Post-rehab | -5.187* | 0.206 | 0 | -5.743 | -4.632 |
|  | Post-op 3 months | -6.146* | 0.156 | 0 | -6.566 | -5.725 |
| Post-op 3 days | Pre-op | 3.292* | 0.216 | 0 | 2.71 | 3.873 |
|  | Post-rehab | -1.896* | 0.213 | 0 | -2.469 | -1.323 |
|  | Post-op 3 months | -2.854* | 0.202 | 0 | -3.399 | -2.309 |
| Post-rehab | Pre-op | 5.187* | 0.206 | 0 | 4.632 | 5.743 |
|  | Post-op 3 days | 1.896* | 0.213 | 0 | 1.323 | 2.469 |
|  | Post-op 3 months | -.958* | 0.19 | 0 | -1.47 | -0.446 |
| Post-op 3 months | Pre-op | 6.146* | 0.156 | 0 | 5.725 | 6.566 |
|  | Post-op 3 days | 2.854* | 0.202 | 0 | 2.309 | 3.399 |
|  | Post-rehab | .958* | 0.19 | 0 | 0.446 | 1.47 |
| Control group | Pre-op | Post-op 3 days | -3.292* | 0.216 | 0 | -3.873 | -2.71 |
|  | Post-rehab | -4.896* | 0.206 | 0 | -5.452 | -4.34 |
|  | Post-op 3 months | -5.958* | 0.156 | 0 | -6.379 | -5.538 |
| Post-op 3 days | Pre-op | 3.292* | 0.216 | 0 | 2.71 | 3.873 |
|  | Post-rehab | -1.604* | 0.213 | 0 | -2.177 | -1.031 |
|  | Post-op 3 months | -2.667* | 0.202 | 0 | -3.212 | -2.121 |
| Post-rehab | Pre-op | 4.896* | 0.206 | 0 | 4.34 | 5.452 |
|  | Post-op 3 days | 1.604* | 0.213 | 0 | 1.031 | 2.177 |
|  | Post-op 3 months | -1.062* | 0.19 | 0 | -1.574 | -0.551 |
| Post-op 3 months | Pre-op | 5.958* | 0.156 | 0 | 5.538 | 6.379 |
|  | Post-op 3 days | 2.667* | 0.202 | 0 | 2.121 | 3.212 |
|  | Post-rehab | 1.063* | 0.19 | 0 | 0.551 | 1.574 |
| Based on estimated marginal means. | | | | | | | |
| * Mean difference is significant at the 0.05 level. | | | | | | | |
| Adjustment for multiple comparisons: Bonferroni correction | | | | | | | |

**Supplementary Table S4. Pairwise comparisons of C2–7 Cobb angle within and between timepoints in the FSN and control groups.**

| Pairwise comparison of C2~7 Cobb within and between timepoints in FSN and Control groups | | | | | | | |
| --- | --- | --- | --- | --- | --- | --- | --- |
| Group | (I) C2~7 Cobb | (J) C2~7 Cobb | Mean Difference(I–J) | Std. Error | Significance | 95% Confidence Interval of Difference | |
| Lower Bound | Upper Bound |
| FSN group | Pre-op | Post-op 3 days | -3.617* | 0.354 | 0 | -4.57 | -2.663 |
|  | Post-rehab | -7.538* | 0.408 | 0 | -8.636 | -6.439 |
|  | Post-op 3 months | -8.596* | 0.441 | 0 | -9.784 | -7.408 |
| Post-op 3 days | Pre-op | 3.617* | 0.354 | 0 | 2.663 | 4.57 |
|  | Post-rehab | -3.921* | 0.351 | 0 | -4.866 | -2.975 |
|  | Post-op 3 months | -4.979* | 0.437 | 0 | -6.158 | -3.8 |
| Post-rehab | Pre-op | 7.538* | 0.408 | 0 | 6.439 | 8.636 |
|  | Post-op 3 days | 3.921* | 0.351 | 0 | 2.975 | 4.866 |
|  | Post-op 3 months | -1.058* | 0.386 | 0.044 | -2.099 | -0.017 |
| Post-op 3 months | Pre-op | 8.596* | 0.441 | 0 | 7.408 | 9.784 |
|  | Post-op 3 days | 4.979* | 0.437 | 0 | 3.8 | 6.158 |
|  | Post-rehab | 1.058* | 0.386 | 0.044 | 0.017 | 2.099 |
| Control group | Pre-op | Post-op 3 days | -3.483* | 0.354 | 0 | -4.437 | -2.53 |
|  | Post-rehab | -6.098* | 0.408 | 0 | -7.197 | -4.999 |
|  | Post-op 3 months | -6.698* | 0.441 | 0 | -7.886 | -5.51 |
| Post-op 3 days | Pre-op | 3.483* | 0.354 | 0 | 2.53 | 4.437 |
|  | Post-rehab | -2.615* | 0.351 | 0 | -3.56 | -1.669 |
|  | Post-op 3 months | -3.215* | 0.437 | 0 | -4.394 | -2.036 |
| Post-rehab | Pre-op | 6.098* | 0.408 | 0 | 4.999 | 7.197 |
|  | Post-op 3 days | 2.615* | 0.351 | 0 | 1.669 | 3.56 |
|  | Post-op 3 months | -0.6 | 0.386 | 0.742 | -1.641 | 0.441 |
| Post-op 3 months | Pre-op | 6.698* | 0.441 | 0 | 5.51 | 7.886 |
|  | Post-op 3 days | 3.215* | 0.437 | 0 | 2.036 | 4.394 |
|  | Post-rehab | 0.6 | 0.386 | 0.742 | -0.441 | 1.641 |
| Based on estimated marginal means. | | | | | | | |
| * Mean difference is significant at the 0.05 level. | | | | | | | |
| Adjustment for multiple comparisons: Bonferroni correction | | | | | | | |

**Supplementary Table S5. Pairwise comparisons of C2–7 SVA within and between timepoints in the FSN and control groups.**

| Pairwise comparison of C2~7 SVA within and between timepoints in FSN and Control groups | | | | | | | |
| --- | --- | --- | --- | --- | --- | --- | --- |
| Group | (I) C2~7 SVA | (J) C2~7 SVA | Mean Difference(I–J) | Std. Error | Significance | 95% Confidence Interval of Difference | |
| Lower Bound | Upper Bound |
| FSN group | Pre-op | Post-op 3 days | 5.892* | 0.607 | 0 | 4.256 | 7.527 |
|  | Post-rehab | 9.808* | 0.683 | 0 | 7.968 | 11.648 |
|  | Post-op 3 months | 13.290* | 0.759 | 0 | 11.243 | 15.336 |
| Post-op 3 days | Pre-op | -5.892* | 0.607 | 0 | -7.527 | -4.256 |
|  | Post-rehab | 3.917* | 0.446 | 0 | 2.713 | 5.12 |
|  | Post-op 3 months | 7.398* | 0.531 | 0 | 5.967 | 8.829 |
| Post-rehab | Pre-op | -9.808* | 0.683 | 0 | -11.648 | -7.968 |
|  | Post-op 3 days | -3.917* | 0.446 | 0 | -5.12 | -2.713 |
|  | Post-op 3 months | 3.481* | 0.481 | 0 | 2.185 | 4.778 |
| Post-op 3 months | Pre-op | -13.290* | 0.759 | 0 | -15.336 | -11.243 |
|  | Post-op 3 days | -7.398* | 0.531 | 0 | -8.829 | -5.967 |
|  | Post-rehab | -3.481* | 0.481 | 0 | -4.778 | -2.185 |
| Control group | Pre-op | Post-op 3 days | 5.802* | 0.607 | 0 | 4.166 | 7.438 |
|  | Post-rehab | 8.481* | 0.683 | 0 | 6.641 | 10.321 |
|  | Post-op 3 months | 12.273* | 0.759 | 0 | 10.227 | 14.319 |
| Post-op 3 days | Pre-op | -5.802* | 0.607 | 0 | -7.438 | -4.166 |
|  | Post-rehab | 2.679* | 0.446 | 0 | 1.476 | 3.882 |
|  | Post-op 3 months | 6.471* | 0.531 | 0 | 5.04 | 7.902 |
| Post-rehab | Pre-op | -8.481* | 0.683 | 0 | -10.321 | -6.641 |
|  | Post-op 3 days | -2.679* | 0.446 | 0 | -3.882 | -1.476 |
|  | Post-op 3 months | 3.792* | 0.481 | 0 | 2.495 | 5.088 |
| Post-op 3 months | Pre-op | -12.273* | 0.759 | 0 | -14.319 | -10.227 |
|  | Post-op 3 days | -6.471* | 0.531 | 0 | -7.902 | -5.04 |
|  | Post-rehab | -3.792* | 0.481 | 0 | -5.088 | -2.495 |
| Based on estimated marginal means. | | | | | | | |
| * Mean difference is significant at the 0.05 level. | | | | | | | |
| Adjustment for multiple comparisons: Bonferroni correction | | | | | | | |

**Supplementary Table S6. Pairwise comparisons of T1 slope within and between timepoints in the FSN and control groups.**

| Pairwise comparison of T1 slope scores within and between timepoints in FSN and Control groups | | | | | | | |
| --- | --- | --- | --- | --- | --- | --- | --- |
| Group | (I) T1 slope | (J) T1 slope | Mean Difference(I–J) | Std. Error | Significance | 95% Confidence Interval of Difference | |
| Lower Bound | Upper Bound |
| FSN group | Pre-op | Post-op 3 days | 5.398* | 0.549 | 0 | 3.918 | 6.878 |
|  | Post-rehab | 9.908* | 0.642 | 0 | 8.178 | 11.638 |
|  | Post-op 3 months | 12.665* | 0.688 | 0 | 10.809 | 14.52 |
| Post-op 3 days | Pre-op | -5.398* | 0.549 | 0 | -6.878 | -3.918 |
|  | Post-rehab | 4.510* | 0.453 | 0 | 3.289 | 5.732 |
|  | Post-op 3 months | 7.267* | 0.469 | 0 | 6.004 | 8.53 |
| Post-rehab | Pre-op | -9.908* | 0.642 | 0 | -11.638 | -8.178 |
|  | Post-op 3 days | -4.510* | 0.453 | 0 | -5.732 | -3.289 |
|  | Post-op 3 months | 2.756* | 0.455 | 0 | 1.53 | 3.983 |
| Post-op 3 months | Pre-op | -12.665* | 0.688 | 0 | -14.52 | -10.809 |
|  | Post-op 3 days | -7.267* | 0.469 | 0 | -8.53 | -6.004 |
|  | Post-rehab | -2.756* | 0.455 | 0 | -3.983 | -1.53 |
| Control group | Pre-op | Post-op 3 days | 3.515* | 0.549 | 0 | 2.034 | 4.995 |
|  | Post-rehab | 7.265* | 0.642 | 0 | 5.535 | 8.995 |
|  | Post-op 3 months | 10.177* | 0.688 | 0 | 8.322 | 12.033 |
| Post-op 3 days | Pre-op | -3.515* | 0.549 | 0 | -4.995 | -2.034 |
|  | Post-rehab | 3.750* | 0.453 | 0 | 2.529 | 4.971 |
|  | Post-op 3 months | 6.663* | 0.469 | 0 | 5.4 | 7.925 |
| Post-rehab | Pre-op | -7.265* | 0.642 | 0 | -8.995 | -5.535 |
|  | Post-op 3 days | -3.750* | 0.453 | 0 | -4.971 | -2.529 |
|  | Post-op 3 months | 2.912* | 0.455 | 0 | 1.686 | 4.139 |
| Post-op 3 months | Pre-op | -10.177* | 0.688 | 0 | -12.033 | -8.322 |
|  | Post-op 3 days | -6.663* | 0.469 | 0 | -7.925 | -5.4 |
|  | Post-rehab | -2.912* | 0.455 | 0 | -4.139 | -1.686 |
| Based on estimated marginal means. | | | | | | | |
| * Mean difference is significant at the 0.05 level. | | | | | | | |
| Adjustment for multiple comparisons: Bonferroni correction | | | | | | | |

**Supplementary Table S7. Pairwise comparisons of cervical ROM within and between timepoints in the FSN and control groups.**

| Pairwise comparison of ROM scores within and between timepoints in FSN and Control groups | | | | | | | |
| --- | --- | --- | --- | --- | --- | --- | --- |
| Group | (I) ROM | (J) ROM | Mean Difference(I–J) | Std. Error | Significance | 95% Confidence Interval of Difference | |
| Lower Bound | Upper Bound |
| FSN group | Pre-op | Post-op 3 days | 6.187* | 0.331 | 0 | 5.296 | 7.079 |
|  | Post-rehab | 2.548* | 0.322 | 0 | 1.679 | 3.416 |
|  | Post-op 3 months | -2.033* | 0.318 | 0 | -2.89 | -1.177 |
| Post-op 3 days | Pre-op | -6.187* | 0.331 | 0 | -7.079 | -5.296 |
|  | Post-rehab | -3.640* | 0.172 | 0 | -4.102 | -3.177 |
|  | Post-op 3 months | -8.221* | 0.205 | 0 | -8.773 | -7.668 |
| Post-rehab | Pre-op | -2.548* | 0.322 | 0 | -3.416 | -1.679 |
|  | Post-op 3 days | 3.640* | 0.172 | 0 | 3.177 | 4.102 |
|  | Post-op 3 months | -4.581* | 0.194 | 0 | -5.105 | -4.057 |
| Post-op 3 months | Pre-op | 2.033* | 0.318 | 0 | 1.177 | 2.89 |
|  | Post-op 3 days | 8.221* | 0.205 | 0 | 7.668 | 8.773 |
|  | Post-rehab | 4.581* | 0.194 | 0 | 4.057 | 5.105 |
| Control group | Pre-op | Post-op 3 days | 6.492* | 0.331 | 0 | 5.6 | 7.383 |
|  | Post-rehab | 4.108* | 0.322 | 0 | 3.24 | 4.977 |
|  | Post-op 3 months | 0.177 | 0.318 | 0.8 | -0.679 | 1.033 |
| Post-op 3 days | Pre-op | -6.492* | 0.331 | 0 | -7.383 | -5.6 |
|  | Post-rehab | -2.383* | 0.172 | 0 | -2.846 | -1.921 |
|  | Post-op 3 months | -6.315* | 0.205 | 0 | -6.867 | -5.762 |
| Post-rehab | Pre-op | -4.108* | 0.322 | 0 | -4.977 | -3.24 |
|  | Post-op 3 days | 2.383* | 0.172 | 0 | 1.921 | 2.846 |
|  | Post-op 3 months | -3.931* | 0.194 | 0 | -4.455 | -3.407 |
| Post-op 3 months | Pre-op | -0.177 | 0.318 | 0.8 | -1.033 | 0.679 |
|  | Post-op 3 days | 6.315* | 0.205 | 0 | 5.762 | 6.867 |
|  | Post-rehab | 3.931* | 0.194 | 0 | 3.407 | 4.455 |
| Based on estimated marginal means. | | | | | | | |
| * Mean difference is significant at the 0.05 level. | | | | | | | |
| Adjustment for multiple comparisons: Bonferroni correction | | | | | | | |
